# Supplementary material for: Ammonium Chloride Ingestion Attenuates Exercise-Induced mRNA Levels in Human Muscle
Source: PubMed Central journal article supplement (PMC4686080; doi:10.1371/journal.pone.0141317), 2015-12-10
Supplement: pone.0141317.s001.pdf [file pone.0141317.s001.pdf]

S1 Dataset. Raw data for individual participants.

**Raw Data - muscle pH**

| Subject | Trial PLAC |      |       | Trial ACID |      |       |
|---------|------------|------|-------|------------|------|-------|
|         | Pre        | Post | "+2h" | Pre        | Post | "+2h" |
| 1       | 7.07       | 6.91 | 6.98  | 7.07       | 6.95 | 7.09  |
| 2       | 7.16       | 6.97 | 7.11  | 7.16       | 7.02 | 7.16  |
| 3       | 7.10       | 6.92 | 7.09  | 7.08       | 6.99 | 7.19  |
| 4       | 7.12       | 6.92 | 7.10  | 7.12       | 6.99 | 7.16  |
| 5       | 7.10       | 6.76 | 7.00  | 7.07       | 6.82 | 7.07  |
| 6       | 7.06       | 6.69 | 7.06  | 7.10       | 6.75 | 7.10  |
| 7       | 7.06       | 6.90 | 7.06  | 7.06       | 6.95 | 7.08  |
| 8       | 7.11       | 6.84 | 7.02  | 7.13       | 6.96 | 7.12  |
| Mean    | 7.10       | 6.86 | 7.05  | 7.10       | 6.93 | 7.12  |
| SD      | 0.04       | 0.11 | 0.05  | 0.04       | 0.09 | 0.04  |

**Raw Data - PGC1a mRNA (a.u.)**

| Subject | Trial PLAC |          |          | Trial ACID |          |          |
|---------|------------|----------|----------|------------|----------|----------|
|         | Pre        | Post     | "+2h"    | Pre        | Post     | "+2h"    |
| 1       | 0.000686   | 0.010217 | 0.121727 | 0.000470   | 0.014118 | 0.042041 |
| 2       | 0.001147   | 0.011167 | 0.042451 | 0.002342   | 0.001615 | 0.111733 |
| 3       | 0.002684   | 0.007635 | 0.066192 | 0.020487   | 0.000591 | 0.004734 |
| 4       | 0.004169   | 0.009878 | 0.103196 | 0.005675   | 0.008082 | 0.000410 |
| 5       | 0.000992   | 0.002475 | 0.051687 | 0.071904   | 0.002811 | 0.019440 |
| 6       | 0.014628   | 0.012868 | 0.117469 | 0.000962   | 0.011746 | 0.076287 |
| 7       | 0.000376   | 0.007450 | 0.018349 | 0.002751   | 0.006761 | 0.014600 |
| 8       | 0.000304   | 0.016539 | 0.089411 | 0.008062   | 0.009108 | 0.074505 |
| Mean    | 0.003      | 0.010    | 0.076    | 0.014      | 0.007    | 0.043    |
| SD      | 0.005      | 0.004    | 0.038    | 0.024      | 0.005    | 0.040    |
| SE      | 0.002      | 0.001    | 0.013    | 0.009      | 0.002    | 0.014    |

**Raw Data - CS mRNA (a.u.)**

| Subject | Trial PLAC |          |          | Trial ACID |          |          |
|---------|------------|----------|----------|------------|----------|----------|
|         | Pre        | Post     | 2h       | Pre        | Post     | 2h       |
| 1       | 0.001242   | 0.044823 | 0.040652 | 0.001222   | 0.039034 | 0.029560 |
| 2       | 0.009946   | 0.036039 | 0.030875 | 0.021732   | 0.010941 | 0.041022 |
| 3       | 0.018810   | 0.024368 | 0.031789 | 0.047121   | 0.003104 | 0.007154 |
| 4       | 0.026038   | 0.026111 | 0.031894 | 0.025810   | 0.022181 | 0.001040 |
| 5       | 0.003315   | 0.011306 | 0.023993 | 0.026866   | 0.013926 | 0.035472 |
| 6       | 0.054277   | 0.036150 | 0.033996 | 0.012188   | 0.035094 | 0.034681 |
| 7       | 0.006782   | 0.047399 | 0.020686 | 0.021313   | 0.038105 | 0.021957 |
| Mean    | 0.017      | 0.032    | 0.031    | 0.022      | 0.023    | 0.024    |
| SD      | 0.019      | 0.013    | 0.007    | 0.014      | 0.014    | 0.015    |

|    |       |       |       |       |       |       |
|----|-------|-------|-------|-------|-------|-------|
| SE | 0.007 | 0.004 | 0.002 | 0.005 | 0.005 | 0.005 |
|----|-------|-------|-------|-------|-------|-------|

### Raw Data – CYTC mRNA (a.u)

| Subject | Trial PLAC |          |          | Trial ACID |          |          |
|---------|------------|----------|----------|------------|----------|----------|
|         | Pre        | Post     | 2h       | Pre        | Post     | 2h       |
| 1       | 0.003808   | 0.038483 | 0.034862 | 0.003219   | 0.036607 | 0.026448 |
| 2       | 0.017436   | 0.038353 | 0.028776 | 0.037944   | 0.026700 | 0.046373 |
| 3       | 0.024389   | 0.025064 | 0.026228 | 0.045870   | 0.006864 | 0.010759 |
| 4       | 0.031234   | 0.026391 | 0.029785 | 0.031982   | 0.026209 | 0.003476 |
| 5       | 0.005702   | 0.015785 | 0.021607 | 0.033215   | 0.017522 | 0.025325 |
| 6       | 0.056788   | 0.037012 | 0.034911 | 0.019569   | 0.034413 | 0.027483 |
| 7       | 0.006080   | 0.035772 | 0.021041 | 0.020800   | 0.034886 | 0.021061 |
| 8       | 0.001644   | 0.045758 | 0.033383 | 0.025273   | 0.017112 | 0.021362 |
| Mean    | 0.018      | 0.033    | 0.029    | 0.027      | 0.025    | 0.023    |
| SD      | 0.019      | 0.010    | 0.006    | 0.013      | 0.011    | 0.013    |
| SE      | 0.007      | 0.003    | 0.002    | 0.005      | 0.004    | 0.004    |

### Raw Data – PGC1b mRNA (a.u)

| Subject | Trial PLAC |          |          | Trial ACID |          |          |
|---------|------------|----------|----------|------------|----------|----------|
|         | Pre        | Post     | "+2h"    | Pre        | Post     | "+2h"    |
| 1       | 0.012654   | 0.024733 | 0.024484 | 0.033882   | 0.020999 | 0.022402 |
| 2       | 0.027458   | 0.021146 | 0.042109 | 0.027168   | 0.027658 | 0.038643 |
| 3       | 0.015103   | 0.014993 | 0.027531 | 0.014707   | 0.007498 | 0.019001 |
| 4       | 0.020931   | 0.015098 | 0.028347 | 0.023817   | 0.010056 | 0.021150 |
| 5       | 0.019906   | 0.027933 | 0.034380 | 0.025982   | 0.018563 | 0.027758 |
| 6       | 0.030449   | 0.020268 | 0.028855 | 0.017437   | 0.020330 | 0.032866 |
| 7       | 0.013309   | 0.025449 | 0.024935 | 0.019120   | 0.018626 | 0.034302 |
| 8       | 0.008379   | 0.029477 | 0.039758 | 0.019042   | 0.021727 | 0.028420 |
| Mean    | 0.019      | 0.022    | 0.031    | 0.023      | 0.018    | 0.028    |
| SD      | 0.008      | 0.005    | 0.007    | 0.006      | 0.006    | 0.007    |
| SE      | 0.003      | 0.002    | 0.002    | 0.002      | 0.002    | 0.002    |

### Raw Data – HKII mRNA (a.u)

| Subject | Trial PLAC |          |          | Trial ACID |          |          |
|---------|------------|----------|----------|------------|----------|----------|
|         | Pre        | Post     | 2h       | Pre        | Post     | 2h       |
| 1       | 0.008543   | 0.048781 | 0.072321 | 0.013981   | 0.067447 | 0.064715 |
| 2       | 0.018254   | 0.095888 | 0.096629 | 0.053795   | 0.026326 | 0.145424 |
| 3       | 0.016663   | 0.031891 | 0.052055 | 0.067834   | 0.003450 | 0.011216 |
| 4       | 0.017012   | 0.029783 | 0.044497 | 0.021785   | 0.027972 | 0.002228 |
| 5       | 0.005990   | 0.037881 | 0.047495 | 0.047757   | 0.013463 | 0.039897 |
| 6       | 0.092377   | 0.072499 | 0.071135 | 0.028556   | 0.082249 | 0.084125 |
| 7       | 0.036637   | 0.027895 | 0.061026 | 0.073561   | 0.088247 | 0.031644 |
| 8       | 0.063600   | 0.076469 | 0.090215 | 0.051887   | 0.054701 | 0.057866 |
| Mean    | 0.032      | 0.053    | 0.067    | 0.045      | 0.045    | 0.055    |
| SD      | 0.031      | 0.026    | 0.019    | 0.022      | 0.032    | 0.046    |
| SE      | 0.011      | 0.009    | 0.007    | 0.008      | 0.011    | 0.016    |

**Raw Data – GLUT4 mRNA (a.u.)**

| Subject | Trial PLAC |        |        | Trial ACID |          |          |
|---------|------------|--------|--------|------------|----------|----------|
|         | Pre        | Post   | 2h     | Pre        | Post     | 2h       |
| 1       | 0.0031     | 0.0287 | 0.0266 | 0.001862   | 0.024778 | 0.023716 |
| 2       | 0.0110     | 0.0267 | 0.0222 | 0.022641   | 0.013559 | 0.030165 |
| 3       | 0.0163     | 0.0183 | 0.0225 | 0.022426   | 0.004204 | 0.011742 |
| 4       | 0.0218     | 0.0194 | 0.0244 | 0.013461   | 0.007466 | 0.033718 |
| 5       | 0.0075     | 0.0119 | 0.0167 | 0.025411   | 0.028859 | 0.00224  |
| 6       | 0.0560     | 0.0343 | 0.0318 | 0.013069   | 0.034052 | 0.037158 |
| 7       | 0.0070     | 0.0397 | 0.0222 | 0.022099   | 0.027507 | 0.027341 |
| 8       | 0.0089     | 0.0370 | 0.0381 | 0.028188   | 0.02985  | 0.032982 |
| Mean    | 0.016      | 0.027  | 0.026  | 0.019      | 0.021    | 0.025    |
| SD      | 0.017      | 0.010  | 0.007  | 0.009      | 0.011    | 0.012    |
| SE      | 0.006      | 0.003  | 0.002  | 0.003      | 0.004    | 0.004    |

**Raw Data – PDK4 mRNA (a.u.)**

| Subject | Trial PLAC |          |          | Trial ACID |          |          |
|---------|------------|----------|----------|------------|----------|----------|
|         | Pre        | Post     | "+2h"    | Pre        | Post     | "+2h"    |
| 1       | 0.000108   | 0.017929 | 0.035726 | 0.000550   | 0.083653 | 0.108527 |
| 2       | 0.008412   | 0.100240 | 0.088361 | 0.016623   | 0.007085 | 0.101995 |
| 3       | 0.008142   | 0.035648 | 0.013810 | 0.001772   | 0.054119 | 0.016732 |
| 4       | 0.004984   | 0.009640 | 0.010079 | 0.003242   | 0.004928 | 0.000100 |
| 5       | 0.002058   | 0.023321 | 0.165031 | 0.017655   | 0.019611 | 0.115158 |
| 6       | 0.052139   | 0.097969 | 0.082912 | 0.005024   | 0.053469 | 0.083735 |
| 7       | 0.000691   | 0.025902 | 0.041444 | 0.001267   | 0.026461 | 0.031505 |
| 8       | 0.000100   | 0.024016 | 0.053491 | 0.020624   | 0.038266 | 0.103851 |
| Mean    | 0.010      | 0.042    | 0.061    | 0.008      | 0.036    | 0.070    |
| SD      | 0.018      | 0.036    | 0.051    | 0.008      | 0.027    | 0.046    |
| SE      | 0.006      | 0.013    | 0.018    | 0.003      | 0.010    | 0.016    |

**Raw Data – FOXO1 mRNA (a.u.)**

| Subject | Trial PLAC |          |          | Trial ACID |          |          |
|---------|------------|----------|----------|------------|----------|----------|
|         | Pre        | Post     | "+2h"    | Pre        | Post     | "+2h"    |
| 1       | 0.003088   | 0.044481 | 0.051481 | 0.005145   | 0.035460 | 0.048344 |
| 2       | 0.024267   | 0.044727 | 0.061151 | 0.018616   | 0.017704 | 0.070546 |
| 3       | 0.012849   | 0.028754 | 0.025870 | 0.039271   | 0.004291 | 0.040115 |
| 4       | 0.019952   | 0.024747 | 0.042508 | 0.018970   | 0.024080 | 0.003289 |
| 5       | 0.008072   | 0.034754 | 0.074711 | 0.048574   | 0.029808 | 0.091463 |
| 6       | 0.044469   | 0.036236 | 0.089353 | 0.019658   | 0.034689 | 0.058909 |
| 7       | 0.007153   | 0.032038 | 0.040636 | 0.030236   | 0.035464 | 0.035927 |
| 8       | 0.001124   | 0.039268 | 0.056723 | 0.032305   | 0.056744 | 0.059353 |
| Mean    | 0.015      | 0.036    | 0.055    | 0.027      | 0.030    | 0.051    |
| SD      | 0.014      | 0.007    | 0.020    | 0.014      | 0.015    | 0.026    |

|    |       |       |       |       |       |       |
|----|-------|-------|-------|-------|-------|-------|
| SE | 0.005 | 0.003 | 0.007 | 0.005 | 0.005 | 0.009 |
|----|-------|-------|-------|-------|-------|-------|
